# Supplementary material
Source: publisher figshare collection journal article supplement (https://acs.figshare.com/ndownloader/files/26057029)
Supplement: Supplementary file 1 [file 26057029]

# SUPPORTING INFORMATION

## **Descriptor-guided Design and Experimental Synthesis of Metal-doped TiO<sub>2</sub> for Propane Dehydrogenation**

Liqi Xiao<sup>a</sup>, Zean Xie<sup>b</sup>, Shaojia Song<sup>a</sup>, Zhiping Zhao<sup>a</sup>, Ming Ke<sup>a</sup>, Weiyu Song<sup>a,\*</sup>,  
Jian Liu<sup>a,\*</sup>, Zhen Zhao<sup>a,b,\*</sup>

<sup>a</sup>State Key Laboratory of Heavy Oil Processing, China University of Petroleum  
Beijing 102249, P.R. China

<sup>b</sup>Institute of Catalysis for Energy and Environment, Shenyang Normal University,  
Shenyang 110034, China

Corresponding author: songwy@cup.edu.cn, liujian@cup.edu.cn,  
zhenzhao@cup.edu.cn

## 1. Derivation of Microkinetic Equation Model

Differential equation models are used to study each elementary reaction, and thus the entire propane dehydrogenation reaction. The reaction rate constant of the elementary reaction can be expressed by the Eyring equation:

$$k = A e^{\frac{E_a}{k_b T}} \quad (1)$$

$$A = \frac{k_b T}{h} \frac{Q^{TS}}{Q} \quad (2)$$

Where,  $k$  is the reaction rate constant.  $A$  is the pre-factor.  $k_b$  is the Boltzmann constant.  $T$  is temperature.  $h$  is the Planck constant.  $E_a$  is the energy barrier of the elementary reaction.  $Q$  and  $Q^{TS}$  are partition functions of ground state and transition state.

In the elementary reaction, the entropy change can be ignored, and the pre-factor can be approximated. During the adsorption process,  $E_a = 0$ , the entropy change can be expressed by a partition function, that is, the product of the translation, rotation, and vibration partition functions corresponding to the configurational degrees of freedom of the surface complexes.

In the transition state, there are two degrees of freedom in translation, three degrees of freedom in rotation, and  $3N-5$  degrees of freedom in vibration. In the initial state, all gas molecules in the gas phase are considered to be included.

Based on the above assumptions, the adsorption reaction rate equation:

$$k_{ads} = \frac{PA}{\sqrt{2\pi m k_b T}} S \quad (3)$$

where P is the partial pressure of the adsorbate in the gas phase (in Pa). A is the surface area of the adsorption site (in m<sup>2</sup>). m is the mass of the adsorbate (in kg). and S is the dimensionless sticking coefficient.

The desorption process is the reverse process of adsorption: molecules enter the gas phase from the catalyst surface. In the transition state, there are two degrees of freedom in translation, three degrees of freedom in rotation, and 3N-6 degrees of freedom in vibration. The initial fully adsorbed state contains only vibration degrees of freedom. Therefore, the desorption rate equation:

$$k = \frac{k_b T^3}{h^3} \frac{A(2\pi m k_b)}{\sigma \theta_{rot}} \exp\left(\frac{-E_{des}}{k_b T}\right) \quad (4)$$

Where,  $\sigma$  is symmetry number.  $\theta_{rot}$  is the characteristic temperature for rotation.  $E_{des}$  is the desorption energy.

For kinetic calculations, the reaction rate of any component M is required, which can be solved using the following differential equation:

$$r_i = \sum_{j=1}^N (k_j v_i^j \prod_{k=1}^M c_k^{v_k^j}) \quad (5)$$

Where,  $k_j$  is the rate constant of the elementary reaction.  $v_i$  is the stoichiometric ratio of component i in the elementary reaction.  $c_k$  is the concentration of component k on the catalyst surface.

The speed control step is calculated by the "degree of rate control" (DRC)<sup>1</sup> method, which was introduced by Campbell et al. For primitive step i, the degree of quick control  $X_{RC,i}$  is defined as:

$$X_{RC,i} = \frac{k_i}{r} \left( \frac{\partial r}{\partial k_i} \right)_{k_j=i, K_i} = \left( \frac{\partial \ln r}{\partial \ln k_i} \right)_{k_j=i, K_i} \quad (6)$$

Where,  $k_i$ ,  $K_i$ , and  $r$  are the rate constants, the equilibrium constant, and the reaction rate for step  $i$ , respectively.

The elementary reaction of the PDH reaction is as follows:

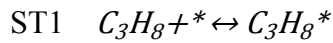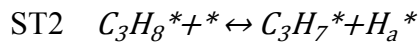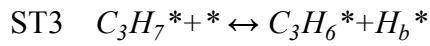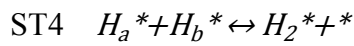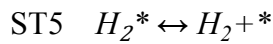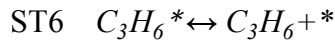

where  $*$  is the active site of the catalyst.

## 2. Experimental Section

### 2.1. Catalyst characterization

XRD patterns were obtained by a powder X-ray diffractometer (Ultima IV) using Cu Ka ( $\lambda = 0.15406$  nm) radiation with a Nickel filter operating at 40 kV and 40 mA in the  $2\theta$  range of  $20-80^\circ$  at a scanning rate of  $10^\circ \text{ min}^{-1}$ . X-ray photoelectron spectra (XPS) were recorded on a Thermo ESCALAB 250Xi. Raman spectra were performed on Renishaw inVia Reflex Raman spectrometer with a 532 nm laser under ambient

conditions. Measurements of UV-Vis diffuse reflectance spectroscopy (UV-Vis DRS) were performed on the UV-Vis spectrophotometer (Hitachi UH4150) with the integration sphere diffuse reflectance attachment. Temperature-programmed reduction with H<sub>2</sub> (H<sub>2</sub>-TPR) measurements were performed on micromeritics AutoChem II 2920. 0.05 g samples were pretreated under air atmosphere at 300 °C for 1 h and subsequently cooled to 60 °C. Afterwards, 10% H<sub>2</sub>/Ar flow (40 ml min<sup>-1</sup>) was passed over the catalyst bed while the temperature was ramped from 60 to 700 °C at a heating rate of 10 °C min<sup>-1</sup>. The hydrogen consumption signal was monitored by a TCD after water removal through cold trap.

## 2.2. Catalytic tests

The catalytic tests for PDH were performed at 550 °C using a continuous-flow fixed-bed quartz tubular reactor. 0.2 g catalysts and feeds containing 2.5 vol% C<sub>3</sub>H<sub>8</sub> in inert gas were used. The C<sub>3</sub>H<sub>8</sub> and the reaction products were analyzed by an on-line gas chromatograph (SP-3420) equipped with HP-PLOT/Q (for CH<sub>4</sub>, C<sub>2</sub>H<sub>4</sub>, C<sub>2</sub>H<sub>6</sub>, C<sub>3</sub>H<sub>6</sub> and C<sub>3</sub>H<sub>8</sub>), TDX-01 (for CO and CO<sub>2</sub>) columns as well as flame ionization detector, CO and CO<sub>2</sub> are converted into CH<sub>4</sub> by hydrogenation in a nickel reformer and then detected by a hydrogen flame ionization detector. The propane conversion (Conv<sub>C<sub>3</sub>H<sub>8</sub></sub>), selectivity of products (S<sub>i</sub>), yield of products (Y<sub>i</sub>), the rate of C<sub>3</sub>H<sub>6</sub> formation (r(C<sub>3</sub>H<sub>6</sub>)) were determined from Eqs. (9)–(11), respectively:

$$C_3H_8 \text{ conversion}(\%) = ((F_{C_3H_8})_{in} - (F_{C_3H_8})_{out}) / (F_{C_3H_8})_{in} \quad (7)$$

$$S_i(\%) = (100n_i(F_i)_{out}) / (3(F_{C_3H_8})_{in} - 3(F_{C_3H_8})_{out}) \quad (8)$$

$$Y_i(\%) = C_{C_3H_8} \cdot S_i / 100 \quad (9)$$

$$r(C_3H_6) = (F_{C_3H_8})_{in} Y_i / m_{cat} \cdot 1000 / 60 / 42 \quad (10)$$

where  $i$  represents the hydrocarbon products in the effluent gas,  $n_i$  is the number of carbon atoms of component  $i$ ,  $F_i$  is the corresponding flow rate and  $m_i$  is the catalysts mass.

The deactivation constant ( $h^{-1}$ ) =  $[\ln(\frac{1-Con_{Final}}{Con_{Final}}) - \ln(\frac{1-Con_{Initial}}{Con_{Initial}})]/t$ , where, the  $Con_{Final}$  and  $Con_{Initial}$  are the final and initial conversions of the PDH reaction, respectively, and  $t$  is the duration of a PDH reaction in hour.

### 3. Doping formation energy

The formation energy of doped metal to replace Ti lattice is calculated as follows:

$$E(form) = E(Ti_{71}MO_{144}) - (Ti_{72}O_{144}) + \mu(Ti) - \mu(M) \quad (11)$$

Ti-rich condition:

$$\mu(Ti) = \mu(Ti)_{bulk} \quad (12)$$

O-rich condition:

$$\mu(O) = 1/2 \mu(O_2) \quad (13)$$

$$\mu(Ti) = E(TiO_2)_{bulk} - 2\mu(O) \quad (14)$$

The formation energy of doped metal to replace O lattice is calculated as follows:

$$E(form) = E(Ti_{72}MO_{143}) - (Ti_{72}O_{144}) + \mu(O) - \mu(M) \quad (15)$$

Ti-rich condition:

$$\mu(Ti) = \mu(Ti)_{bulk} \quad (16)$$

$$\mu(O) = 1/2(E(TiO_2)_{bulk} - \mu(Ti)) \quad (17)$$

O-rich condition:

$$\mu(O) = 1/2\mu(O_2) \quad (18)$$

where,  $E(Ti_{72}O_{144})$  and  $E(Ti_{71}MO_{144})$ ,  $E(Ti_{72}MO_{143})$  are the energy before and after metal M doping.  $\mu(M)$  is the chemical potential of the metal M taken as the free energy of one M atom in bulk M.  $\mu(Ti)_{bulk}$  amounts to the energy of one Ti atom in bulk Ti.  $\mu(O_2)$  is the energy of oxygen molecules.

**Table S1 Formation energy of metal doping in Ti-rich and O-rich conditions**

|                                   | Energy / eV       |                  |
|-----------------------------------|-------------------|------------------|
|                                   | Ti-rich condition | O-rich condition |
| <b>Sc-Ti</b>                      | -2.52             | -7.67            |
| <b>Ti-Sc</b>                      | -1.04             | -6.19            |
| <b>Sc replaces O<sub>2c</sub></b> | 2.07              | 4.65             |
| <b>V-Ti</b>                       | -1.61             | -6.76            |
| <b>Ti-V</b>                       | 1.16              | -3.99            |
| <b>V replaces O<sub>2c</sub></b>  | 4.30              | 6.88             |

|                                   |      |       |
|-----------------------------------|------|-------|
| <b>Cr-Ti</b>                      | 2.33 | -2.82 |
| <b>Ti-Cr</b>                      | 2.98 | -2.17 |
| <b>Cr replaces O<sub>2c</sub></b> | 4.78 | 7.36  |
| <b>Mn-Ti</b>                      | 1.98 | -3.17 |
| <b>Mn replaces O<sub>2c</sub></b> | 3.65 | 6.23  |

## 4. Effective Bader charge of intact and defective surface atoms

**Table S2 Bader charge of two coordinated oxygen and four coordinated metal atoms on perfect TiO<sub>2</sub>(101) surfaces (M: Five coordination metal atoms on the surface, as shown in Ti<sub>5c</sub> in Figure 1. O: two-coordinated oxygen atoms on the surface, as shown in O<sub>2c</sub> in Figure 1)**

|                        | <b>M</b> |                    |       |        | <b>O</b>            |        |
|------------------------|----------|--------------------|-------|--------|---------------------|--------|
| <b>TiO<sub>2</sub></b> | 2.026    | 2.025              | 2.026 | -0.922 | -0.922 <sup>c</sup> | -0.925 |
| <b>Sc-Ti</b>           | 2.028    | 2.005 <sup>a</sup> | 2.025 | -0.926 | -0.989 <sup>c</sup> | -0.923 |
| <b>V-Ti</b>            | 2.019    | 1.862 <sup>a</sup> | 2.023 | -0.923 | -0.833 <sup>c</sup> | -0.923 |
| <b>Cr-Ti</b>           | 2.028    | 1.772 <sup>a</sup> | 2.026 | -0.924 | -0.814 <sup>c</sup> | -0.924 |
| <b>Mn-Ti</b>           | 2.017    | 1.713 <sup>a</sup> | 2.024 | -0.912 | -0.831 <sup>c</sup> | -0.918 |
| <b>Ti-Sc</b>           | 2.029    | 2.002 <sup>b</sup> | 2.026 | -0.920 | -0.980 <sup>c</sup> | -0.921 |
| <b>Ti-V</b>            | 2.023    | 2.029 <sup>b</sup> | 2.022 | -0.929 | -0.872 <sup>c</sup> | -0.931 |
| <b>Ti-Cr</b>           | 2.018    | 2.032 <sup>b</sup> | 2.020 | -0.916 | -0.851 <sup>c</sup> | -0.928 |

<sup>a</sup> bader charge value of doped metal atoms



<sup>b</sup> bader charge value of Ti atoms

<sup>c</sup> bader charge value of oxygen atoms connected to doped metals

**Table S3 Bader charge of two coordinated oxygen and four coordinated metal atoms on defective TiO<sub>2</sub>(101) surfaces (M: The left and right are the five coordinated Ti atoms on the surface, and the middle are metal atoms connected by oxygen vacancies. O: Two coordinated oxygen atoms connected by oxygen vacancies)**

|                        | <b>M</b> |                    |       |        | <b>O</b> |        |
|------------------------|----------|--------------------|-------|--------|----------|--------|
| <b>TiO<sub>2</sub></b> | 2.019    | 1.890              | 2.013 | -0.947 | -        | -0.946 |
| <b>Sc-Ti</b>           | 2.024    | 1.960 <sup>a</sup> | 2.019 | -0.957 | -        | -0.960 |
| <b>V-Ti</b>            | 2.015    | 1.794 <sup>a</sup> | 2.014 | -0.953 | -        | -0.944 |
| <b>Cr-Ti</b>           | 2.014    | 1.671 <sup>a</sup> | 2.007 | -0.948 | -        | -0.951 |
| <b>Mn-Ti</b>           | 2.007    | 1.416 <sup>a</sup> | 2.003 | -0.936 | -        | -0.947 |
| <b>Ti-Sc</b>           | 2.015    | 1.812 <sup>b</sup> | 2.014 | -0.945 | -        | -0.948 |
| <b>Ti-V</b>            | 2.018    | 1.893 <sup>b</sup> | 2.019 | -0.952 | -        | -0.955 |
| <b>Ti-Cr</b>           | 2.022    | 1.783 <sup>b</sup> | 2.026 | -0.932 | -        | -0.934 |

<sup>a</sup> bader charge value of doped metal atoms

<sup>b</sup> bader charge value of Ti atoms

## 5. d-band center of the doping metal and Ti atom of TiO<sub>2</sub>(101)

Table S4 d-band center of the doping metal and Ti atom of TiO<sub>2</sub>(101)

|                  | d band center / eV |
|------------------|--------------------|
| TiO <sub>2</sub> | -1.04              |
| Sc-Ti            | -1.04              |
| V-Ti             | -1.24              |
| Cr-Ti            | -1.01              |
| Mn-Ti            | -0.65              |
| Ti-Sc            | -1.02              |
| Ti-V             | -1.24              |
| Ti-Cr            | -1.00              |

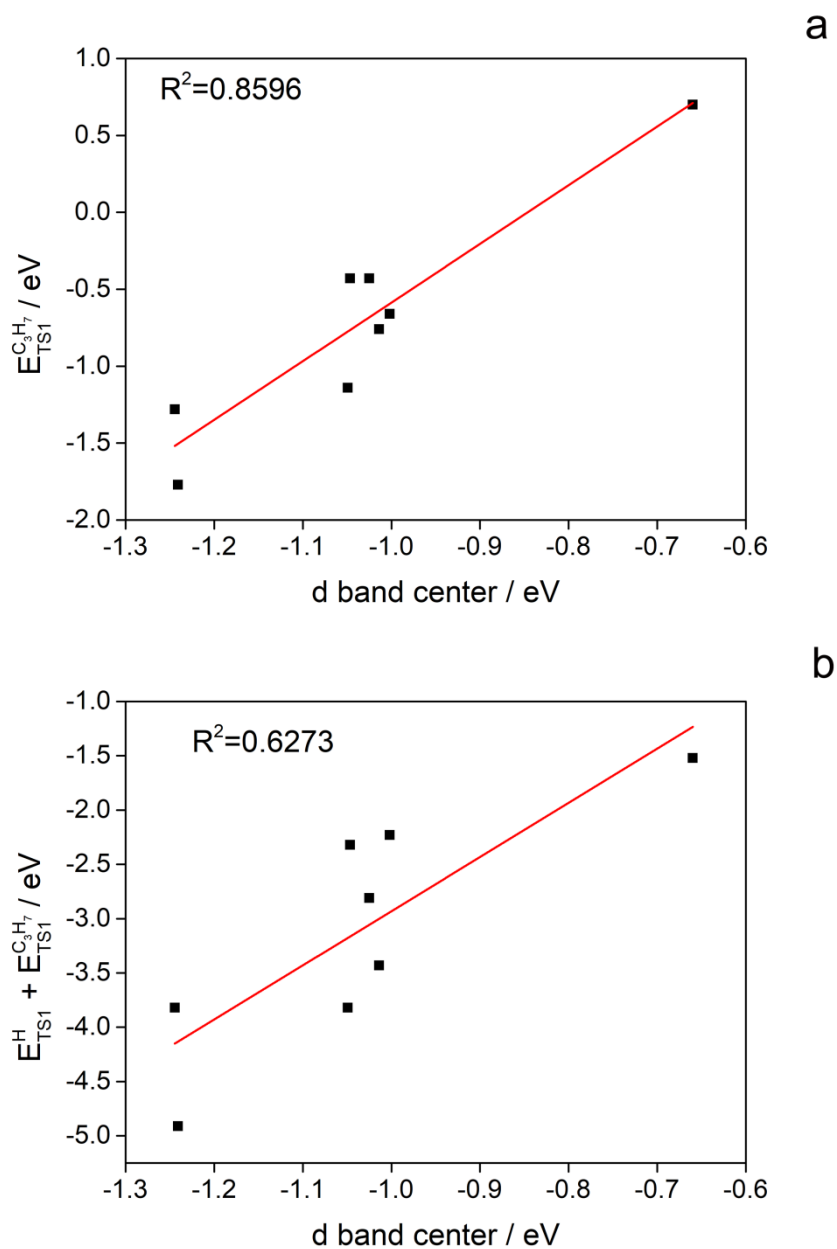

Figure S1. Correlation between the d band center and (left) the binding energies of  $C_3H_7$  in TS1 configurations, (right) sum of binding energies of  $C_3H_7$  and H in TS1 configuration.

## 6. Dehydrogenation transition state structure

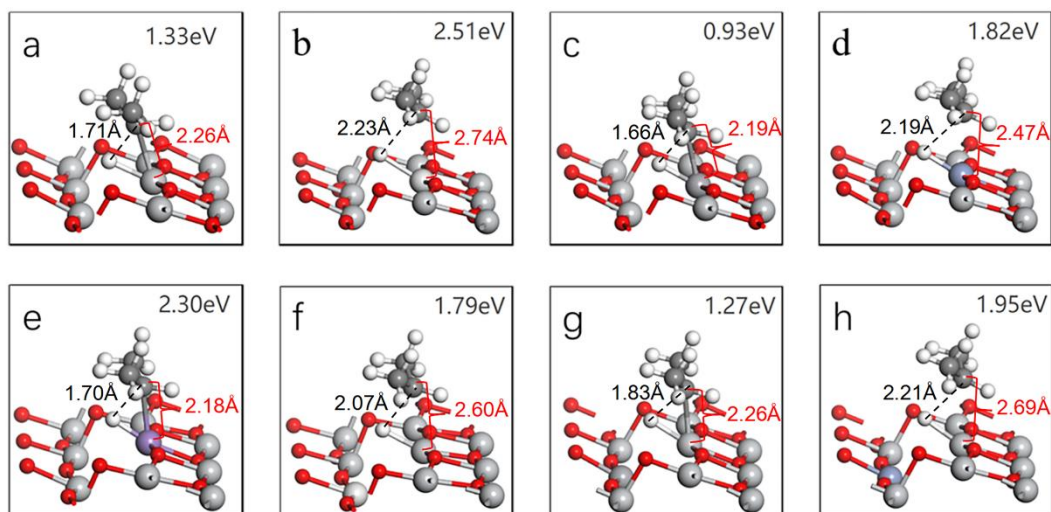

**Figure S2.** First step dehydrogenation transition state structure and energy barrier: a) TiO<sub>2</sub>, b) Sc-Ti, c) V-Ti, d) Cr-Ti, e) Mn-Ti, f) Ti-Sc, g) Ti-V, h) Ti-Cr.

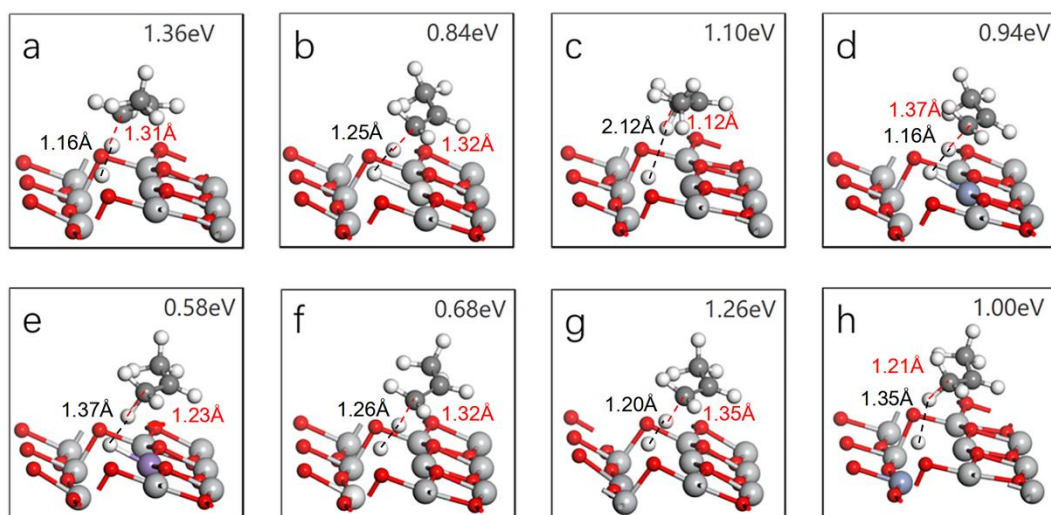

**Figure S3.** Second step dehydrogenation transition state structure and energy barrier: a) TiO<sub>2</sub>, b) Sc-Ti, c) V-Ti, d) Cr-Ti, e) Mn-Ti, f) Ti-Sc, g) Ti-V, h) Ti-Cr.

## 7. Energy barrier decomposition calculation

To provide further insight into the C<sub>3</sub>H<sub>8</sub> dissociation energy barriers, we use the following scheme to decompose the calculated barrier  $E_{a1}$  and  $E_{a2}$ .  $E_{a1}$  and  $E_{a2}$  of the different catalysts' surfaces, shown as calculated in Eqs. (19) and (20)<sup>2</sup>:

$$E_{a1} = \Delta E_{slab} + \Delta E_{def-C_3H_8} - E_{IS1}^{C_3H_8} + E_{TS1}^{C_3H_7} + E_{TS1}^H - E_{int-C_3H_7 \cdots H} \quad (19)$$

$$E_{a2} = \Delta E_{slab} + \Delta E_{def-C_3H_7 \& H} - E_{IS2}^{C_3H_7 \& H} + E_{TS2}^{C_3H_6} + E_{TS1}^{H_2} - E_{int-C_3H_6 \cdots H \cdots H} \quad (20)$$

Where  $\Delta E_{slab}$  is the influence of the structural change of the catalysts substrate from IS to TS on the barrier (due to the vacancy of the O atom and Transition metal doping).  $\Delta E_{def-C_3H_8}$  and  $\Delta E_{def-C_3H_7 \& H}$  are called deformation energy, which reflects the effect of the structural deformation of  $C_3H_8$  and  $C_3H_7 \& H$  on the activation energy.  $E_{IS1}^{C_3H_8}$  and  $E_{IS2}^{C_3H_7 \& H}$  are the adsorption energies of  $C_3H_8$  and  $C_3H_7 \& H$  in the IS configuration.  $E_{TS1}^{C_3H_7}$ ,  $E_{TS1}^H$ ,  $E_{TS2}^{C_3H_6}$ ,  $E_{TS2}^{H_2}$  are the binding energies of  $C_3H_7$  (without H), H (without  $C_3H_7$ ) in TS1 configurations, and  $C_3H_6$  (without  $H_2$ ),  $H_2$  (without  $C_3H_6$ ) in TS2 configurations, respectively.  $E_{int-C_3H_7 \cdots H}$  and  $E_{int-C_3H_6 \cdots H \cdots H}$  are the interaction energy between H and  $C_3H_7$  in TS1,  $H_2$  and  $C_3H_6$  in TS2. The contributions to the energy barrier  $E_{a1}$  and  $E_{a2}$  of each term are displayed in Table S4 and S5, respectively.

**Table S5 The parts of the energy decomposition of the calculated dissociation energy barrier.**

**Reaction :  $C_3H_{8ads} \rightarrow C_3H_{7ads} + H_{ads}$  (The value in parentheses is the difference from pure  $TiO_2$ )**

|                        | $\Delta E_{slab}$ | $\Delta E_{def-C_3H_8}$ | $E_{IS1}^{C_3H_8}$ | $E_{TS1}^{C_3H_7}$ | $E_{TS1}^H$ | $E_{int-C_3H_7 \cdots H}$ | $E_{a1}$ |
|------------------------|-------------------|-------------------------|--------------------|--------------------|-------------|---------------------------|----------|
| <b>TiO<sub>2</sub></b> | 0.35              | 2.32                    | -0.21              | -1.14              | -2.68       | -2.27                     | 1.33     |
| <b>Sc-Ti</b>           | 0.39              | 4.77                    | -0.17              | -0.43              | -1.89       | 0.5                       | 2.51     |
|                        | (0.04)            | (2.45)                  | (0.04)             | (0.71)             | (0.79)      | (2.77)                    |          |
| <b>V-Ti</b>            | 0.97              | 2.1                     | 0.03               | -1.77              | -3.14       | -2.8                      | 0.93     |
|                        | (0.62)            | (-0.22)                 | (0.24)             | (-0.63)            | (-0.46)     | (-0.53)                   |          |

|              |         |        |        |         |        |        |      |
|--------------|---------|--------|--------|---------|--------|--------|------|
| <b>Cr-Ti</b> | -0.16   | 4.76   | -0.13  | -0.76   | -2.67  | -0.52  | 1.82 |
|              | (-0.51) | (2.44) | (0.08) | (0.38)  | (0.01) | (1.75) |      |
| <b>Mn-Ti</b> | 0.25    | 2.32   | -0.08  | 0.7     | -2.22  | -1.17  | 2.3  |
|              | (-0.1)  | (0)    | (0.13) | (1.68)  | (0.46) | (1.1)  |      |
| <b>Ti-Sc</b> | 0.31    | 4.97   | -0.06  | -0.43   | -2.38  | 0.74   | 1.79 |
|              | (-0.04) | (2.65) | (0.15) | (0.71)  | (0.3)  | (3.01) |      |
| <b>Ti-V</b>  | 0.67    | 2.73   | 0.16   | -1.28   | -2.54  | -1.85  | 1.27 |
|              | (0.32)  | (0.4)  | (0.37) | (-0.14) | (0.14) | (0.42) |      |
| <b>Ti-Cr</b> | 0.68    | 4.77   | -0.06  | -0.66   | -1.57  | 1.33   | 1.95 |
|              | (0.33)  | (2.45) | (0.15) | (0.48)  | (1.11) | (3.6)  |      |

**Table S6 The parts of the energy decomposition of the calculated dissociation energy barrier.**

**Reaction :  $C_3H_{7ads} + H_{ads} \rightarrow C_3H_{6ads} + H_{2ads}$  (The value in parentheses is the difference from pure  $TiO_2$ )**

|                        | $\Delta E_{slab}$ | $\Delta E_{def-C_3H_7\&H}$ | $E_{IS2}^{C_3H_7\&H}$ | $E_{TS2}^{C_3H_6}$ | $E_{TS2}^{H_2}$ | $E_{int-C_3H_6\cdots H\cdots H}$ | $E_{a2}$ |
|------------------------|-------------------|----------------------------|-----------------------|--------------------|-----------------|----------------------------------|----------|
| <b>TiO<sub>2</sub></b> | -0.35             | -1.48                      | -3.55                 | -0.31              | 3.31            | 3.36                             | 1.36     |
| <b>Sc-Ti</b>           | -0.19             | -0.74                      | -2.77                 | 0                  | 1.14            | 2.14                             | 0.84     |
|                        | (0.16)            | (0.74)                     | (0.78)                | (0.31)             | (-2.17)         | (-1.22)                          |          |
| <b>V-Ti</b>            | -0.15             | -0.69                      | -3.55                 | 1.1                | 1.44            | 4.15                             | 1.1      |
|                        | (0.2)             | (0.79)                     | (0)                   | (1.41)             | (-1.87)         | (0.79)                           |          |
| <b>Cr-Ti</b>           | -1.51             | -1.05                      | -2.97                 | -0.08              | 0.94            | 0.33                             | 0.94     |

|              |         |        |        |         |         |         |      |
|--------------|---------|--------|--------|---------|---------|---------|------|
|              | (-1.16) | (0.43) | (0.59) | (0.23)  | (-2.37) | (-3.03) |      |
| <b>Mn-Ti</b> | -0.26   | 0.17   | -2.4   | 2.7     | 2.63    | 7.06    | 0.58 |
|              | (0.09)  | (1.65) | (1.15) | (3.01)  | (-0.68) | (3.7)   |      |
| <b>Ti-Sc</b> | -0.29   | -0.85  | -2.84  | -0.09   | 0.76    | 1.69    | 0.68 |
|              | (0.06)  | (0.63) | (0.71) | (0.22)  | (-2.55) | (-1.67) |      |
| <b>Ti-V</b>  | 0.63    | -1.32  | -3.42  | -1.32   | -0.91   | -0.76   | 1.26 |
|              | (0.98)  | (0.16) | (0.13) | (-1.01) | (-4.22) | (-4.12) |      |
| <b>Ti-Cr</b> | -1.43   | 0.37   | -2.87  | 0.07    | 3.15    | 4.03    | 1    |
|              | (-1.08) | (1.85) | (0.68) | (0.38)  | (-0.16) | (0.67)  |      |

## 8. Different reaction paths for the first step dehydrogenation

Taking V-Ti catalyst and Cr-Ti catalyst as examples, the energy barriers of different binding sites of H during the first dehydrogenation are calculated. The energy barrier and final state structure of the reaction are shown in Figure S4. It can be clearly seen from the figure that the energy barrier of the reaction path where H is located at the oxygen vacancy is much lower than the reaction path where hydrogen is combined with O<sub>2c</sub>. This is because when oxygen is removed to form oxygen vacancies, a negative charge band is formed at the oxygen vacancies, which will greatly reduce the energy when adsorbing H. At the same time, H is located at the oxygen vacancy and does not form steric hindrance.

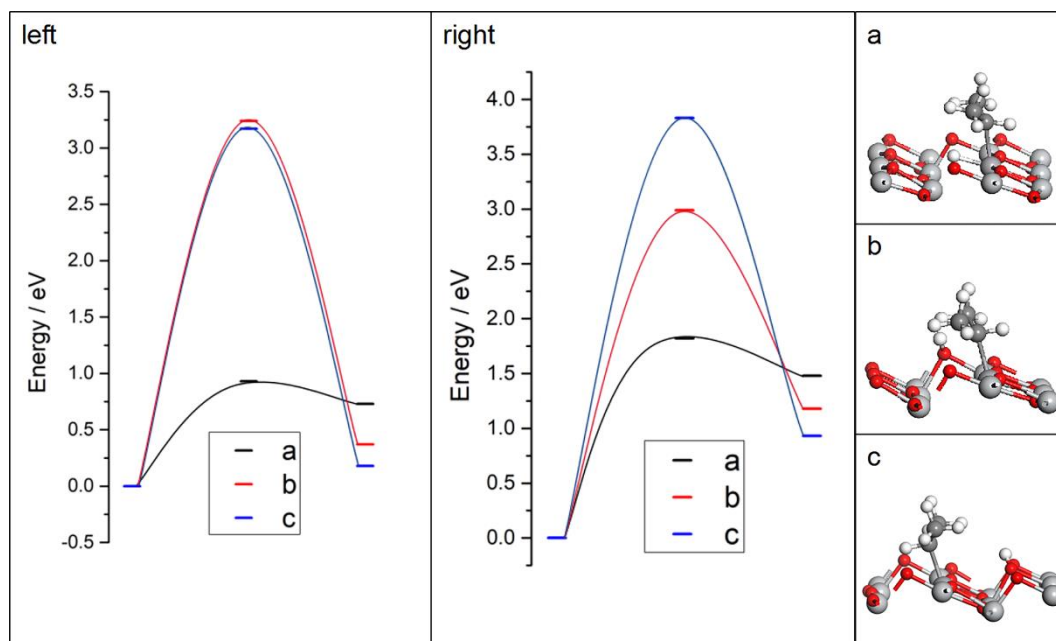

Figure S4. the energy barrier for the first dehydrogenation of left)V-Ti and right)Cr-Ti. Structure diagram of dehydrogenation transition state of a)H is at the oxygen vacancy, b)H is located on the oxygen vacancy adjacent to O<sub>2c</sub> and c)H is located on O<sub>2c</sub> not adjacent to the



**oxygen vacancy.**

## 9. H transfer barrier and second step dehydrogenation barrier

Table S7 shows the energy barrier for H transfer to the nearest O<sub>2c</sub> and the energy barrier for the second step dehydrogenation. Because of the strong attraction of the negative charge band at the oxygen vacancy to H, the transfer of H from the oxygen vacancy to the nearest O<sub>2c</sub> requires higher energy. The energy for further dehydrogenation is much lower than the energy transferred by H. Therefore, the H produced by the first dehydrogenation is located at the oxygen vacancy, and the second dehydrogenation is directly carried out to form hydrogen and propylene without H transfer.

**Table S7 H transfer barrier and second step dehydrogenation barrier(eV)**

|       | H transfer | Second step dehydrogenation |
|-------|------------|-----------------------------|
| Sc-Ti | 2.17       | 0.84                        |
| V-Ti  | 1.90       | 1.10                        |
| Cr-Ti | 2.01       | 0.94                        |
| Mn-Ti | 1.81       | 0.58                        |
| Ti-Sc | 1.86       | 0.68                        |
| Ti-V  | 1.85       | 1.26                        |
| Ti-Cr | 1.78       | 1.00                        |

## 10. Microscopic dynamic analysis

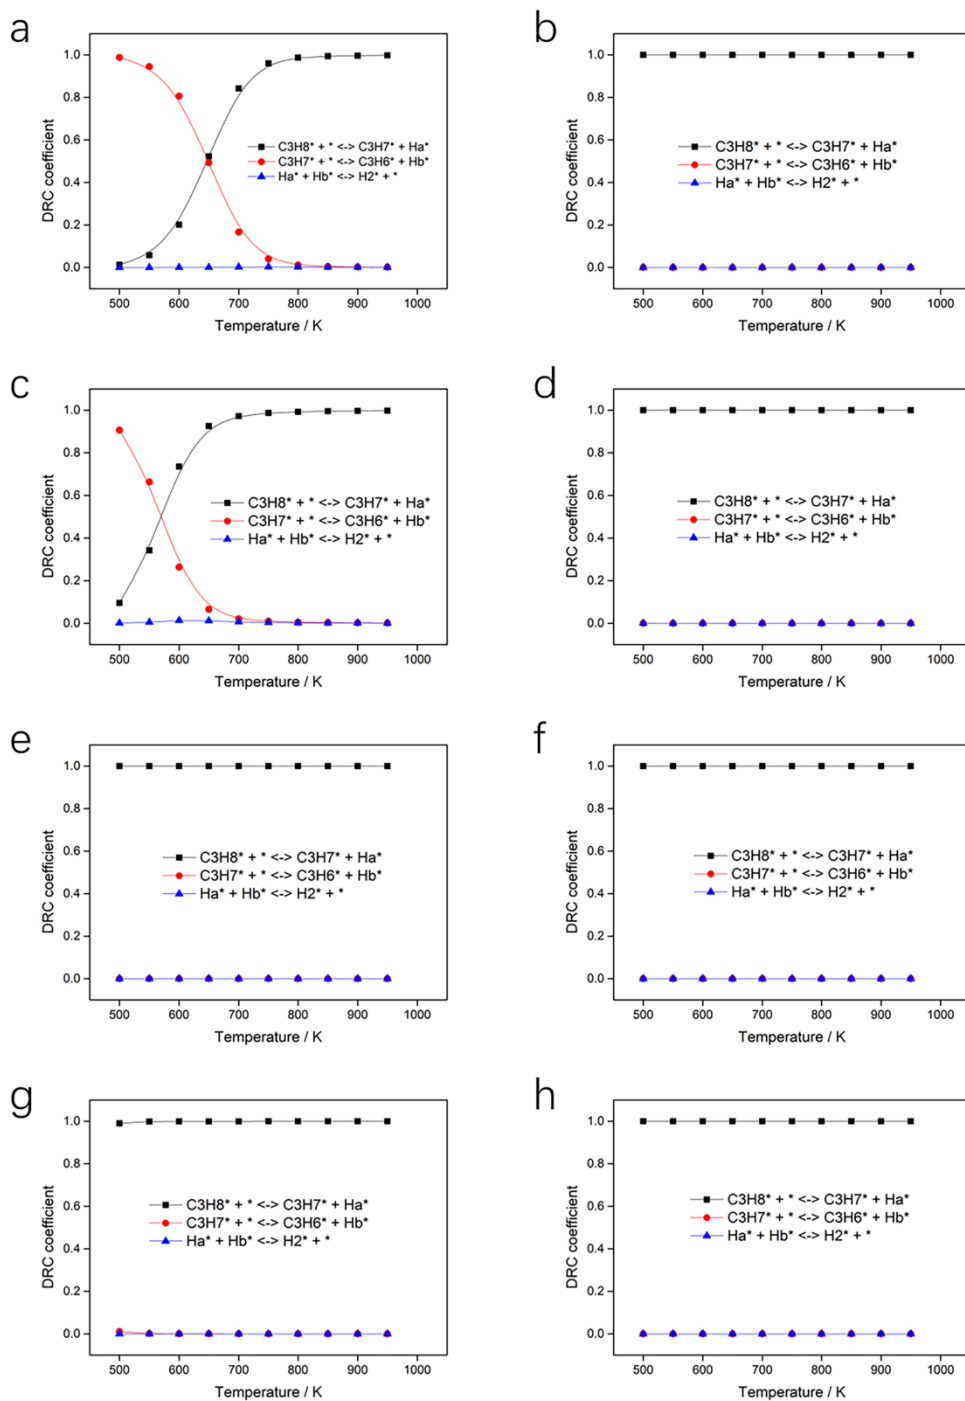

Fig. S5. The degree of rate control as a function of temperature for a)  $\text{TiO}_2$ , b)  $\text{Sc-Ti}$ , c)  $\text{V-Ti}$ , d)  $\text{Cr-Ti}$ , e)  $\text{Mn-Ti}$ , f)  $\text{Ti-Sc}$ , g)  $\text{Ti-V}$ , h)  $\text{Ti-Cr}$ .

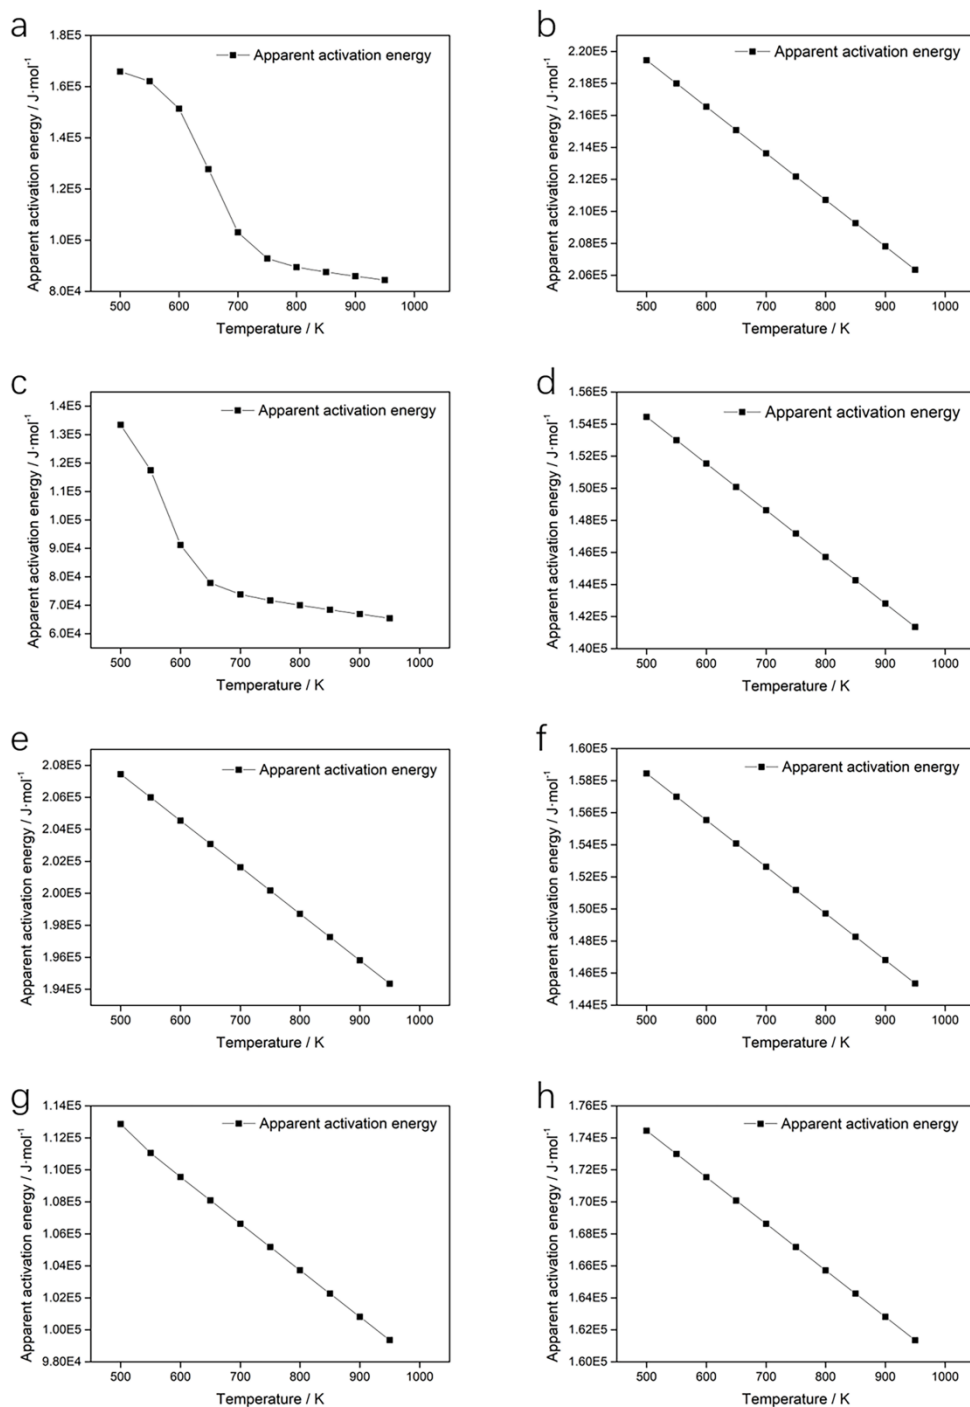

**Fig. S6. Apparent activation energy as a function of temperature for a) TiO<sub>2</sub>, b) Sc-Ti, c) V-Ti, d) Cr-Ti, e) Mn-Ti, f) Ti-Sc, g) Ti-V, h) Ti-Cr.**

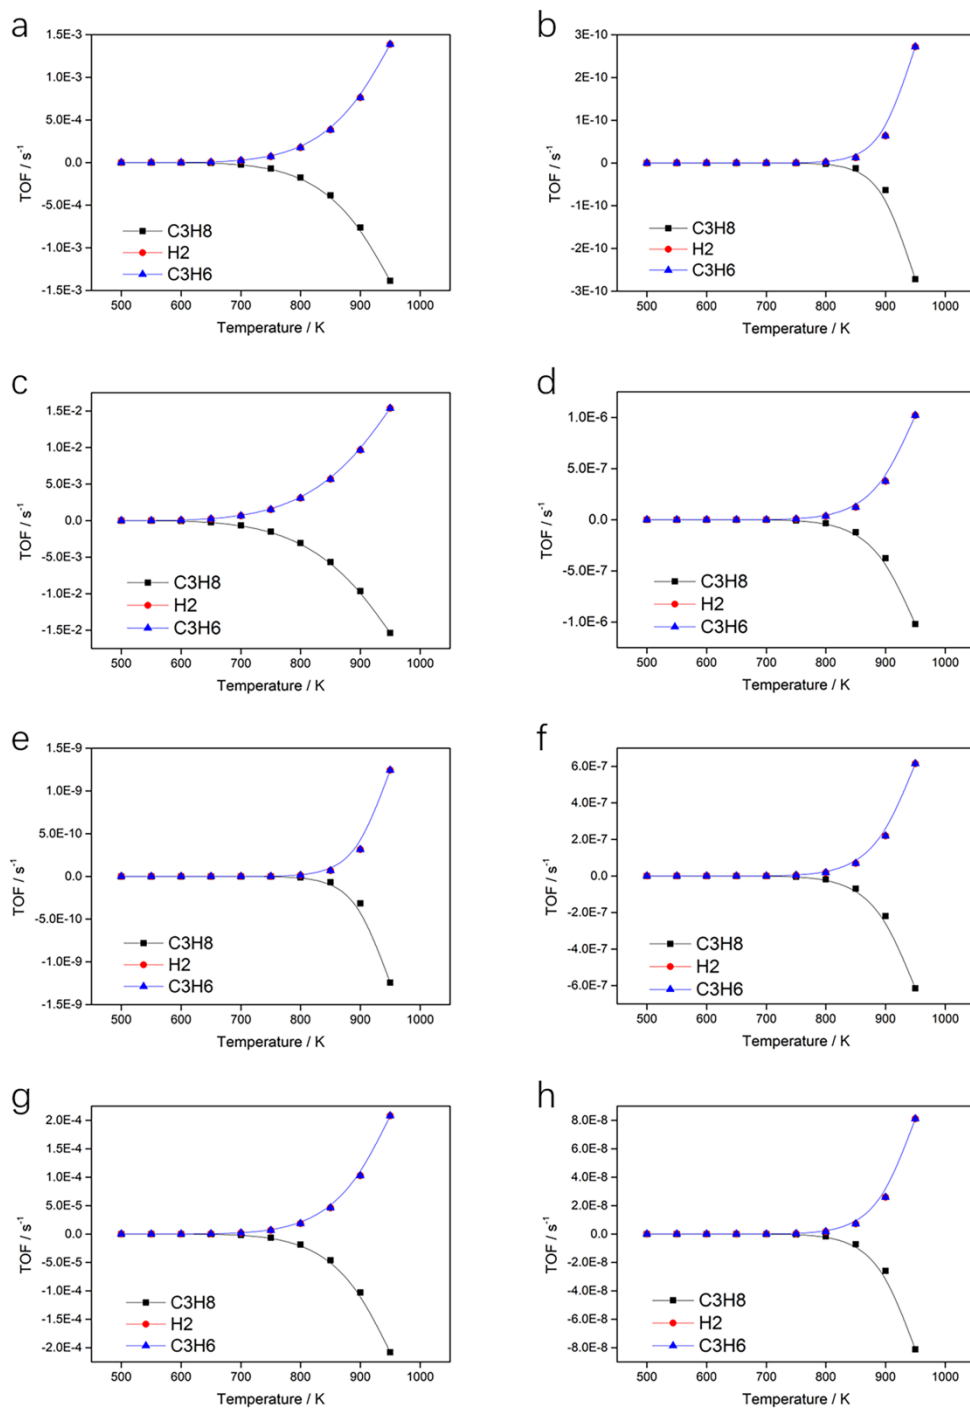

**Fig. S7. Rate of  $\text{C}_3\text{H}_8$ ,  $\text{H}_2$ , and  $\text{C}_3\text{H}_6$  as a function of temperature for a)  $\text{TiO}_2$ , b) Sc-Ti, c) V-Ti, d) Cr-Ti, e) Mn-Ti, f) Ti-Sc, g) Ti-V, h) Ti-Cr.**

## 11. Raman spectra, V 2p<sub>2/3</sub> XPS spectra and UV-Vis absorption spectra

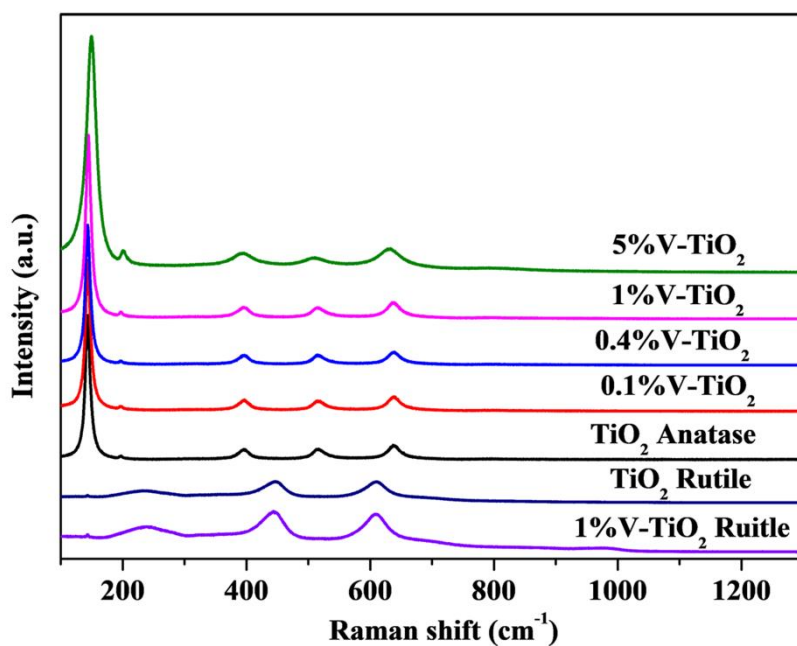

Fig. S8. Raman spectra of the x%V-TiO<sub>2</sub>, 1%V-TiO<sub>2</sub> Rutile, pure TiO<sub>2</sub> (anatase and rutile phase) and V<sub>2</sub>O<sub>5</sub>.

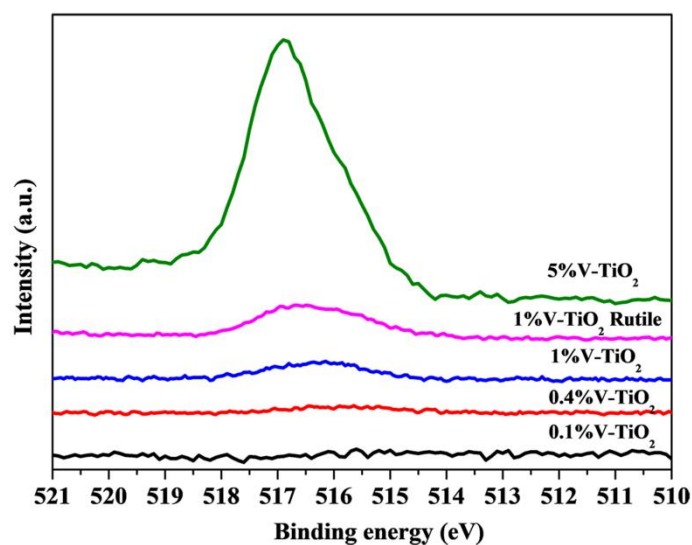

Fig. S9. V 2p<sub>2/3</sub> XPS spectra of the the x%V-TiO<sub>2</sub> and 1%V-TiO<sub>2</sub> Rutile catalysts.

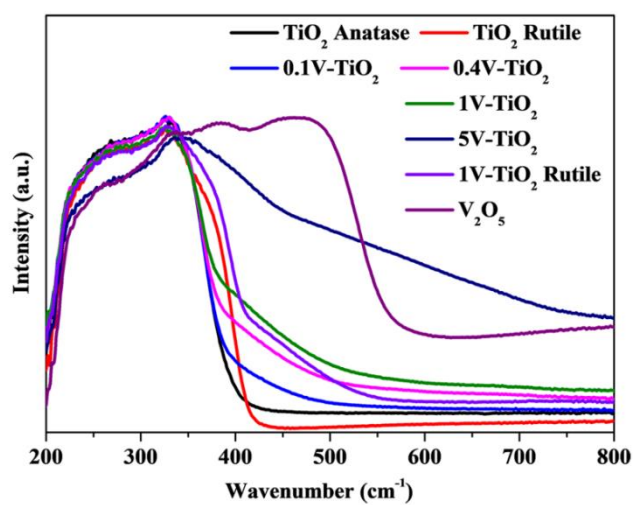

Fig. S10. UV-Vis absorption spectra of the x%V-TiO<sub>2</sub>, 1%V-TiO<sub>2</sub> Rutile, pure TiO<sub>2</sub>(anatase and rutile phase) and V<sub>2</sub>O<sub>5</sub>.

## 12. Catalyst performance of various catalysts

Table S8. Catalytic performance of various catalysts from literature and from the present study in the non-oxidative propane dehydrogenation to propene

| Catalyst                                                       | m/g  | T/°C | C(C <sub>3</sub> H <sub>8</sub> ) | S(C <sub>3</sub> H <sub>6</sub> ) | F <sub>total</sub> /mL·min <sup>-1</sup> | Feeding gas composition                                  | WHSV / h <sup>-1</sup> | STY(C <sub>3</sub> H <sub>6</sub> )/ kg·h <sup>-1</sup> ·kg <sup>-1</sup> | Ref.      |
|----------------------------------------------------------------|------|------|-----------------------------------|-----------------------------------|------------------------------------------|----------------------------------------------------------|------------------------|---------------------------------------------------------------------------|-----------|
| ZrO <sub>2</sub> (reduced in CO)                               | 0.07 | 550  | 28.4                              | 87.0                              | 10                                       | 40 vol% C <sub>3</sub> H <sub>8</sub> in N <sub>2</sub>  | 6.7                    | 1.58                                                                      | 3         |
| PtZn <sub>4</sub> @S-1-H                                       | 0.3  | 550  | 47.4                              | 93.2                              | 40                                       | 25 vol% C <sub>3</sub> H <sub>8</sub> in N <sub>2</sub>  | 3.6                    | 1.59                                                                      | 4         |
| Cr <sub>2</sub> O <sub>3</sub> /ZrO <sub>2</sub>               | 0.2  | 550  | 60.9                              | 76.2                              | 20                                       | 2.5 vol% C <sub>3</sub> H <sub>8</sub> in N <sub>2</sub> | 0.3                    | 0.13                                                                      | 5         |
| Cr <sub>5</sub> /SBA-1                                         | 0.2  | 550  | 33.0                              | 86.0                              | 30                                       | C <sub>3</sub> H <sub>8</sub> /He/N <sub>2</sub> =5:1:9  | 1.2                    | 0.32                                                                      | 6         |
| Ga <sub>2</sub> O <sub>3</sub> /Al <sub>2</sub> O <sub>3</sub> | 0.2  | 600  | 33.4                              | 92.0                              | 20                                       | 2.5 vol% C <sub>3</sub> H <sub>8</sub> in N <sub>2</sub> | 0.3                    | 0.09                                                                      | 7         |
| Sn-HMS                                                         | 1.5  | 600  | 40.0                              | 90.0                              | 5                                        | Pure C <sub>3</sub> H <sub>8</sub>                       | 0.39                   | 0.14                                                                      | 8         |
| 5-10nm TiO <sub>2</sub>                                        | 0.3  | 550  | 11                                | 98                                | 12                                       | C <sub>3</sub> H <sub>8</sub> /N <sub>2</sub> =1:2       | 1.56                   | 0.17                                                                      | 9         |
| 5-10nm TiO <sub>2</sub>                                        | 0.3  | 600  | 31                                | 91                                | 12                                       | C <sub>3</sub> H <sub>8</sub> /N <sub>2</sub> =1:2       | 1.56                   | 0.44                                                                      | 9         |
| 1%V-TiO <sub>2</sub>                                           | 0.3  | 550  | 12.5                              | 98                                | 12                                       | C <sub>3</sub> H <sub>8</sub> /N <sub>2</sub> =1:2       | 1.56                   | 0.18                                                                      | This work |

## Reference

- [1] M. Coltheart, K. Rastle, C. Perry, R. Langdon, J. Ziegler, DRC: A dual route cascaded model of visual word recognition and reading aloud, *Psychological Review*, 108 (2001) 204-256.
- [2] X. Wen, P. Bai, Z. Han, S. Zheng, B. Luo, T. Fang, W. Song, Effect of vacancy on adsorption/dissociation and diffusion of H<sub>2</sub>S on Fe(100) surfaces: A density functional theory study, *Appl. Surf. Sci.* 2019, 465, 833-845.



- [3] Zhang, Y.; Zhao, Y.; Otroshchenko, T.; Lund, H.; Pohl, M.; Rodemerck, U.; Linke, D.; Jiao, H.; Jiang, G.; Kondratenko, E.V. Control of coordinatively unsaturated Zr sites in ZrO<sub>2</sub> for efficient C-H bond activation. *Nat. Commun.* 2018, 9, 3794-3804.
- [4] Sun, Q.; Wang, N.; Fan, Q.; Zeng, L.; Mayoral, A.; Miao, S.; Yang, R.; Jiang, Z.; Zhou, W.; Zhang, J.; Zhang, T.; Xu, J.; Zhang, P.; Cheng, J.; Yang, D.-C.; Jia, R.; Li, L.; Zhang, Q.; Wang, Y.; Terasaki, O.; Yu, J. Subnanometer Bimetallic Pt-Zn Clusters in Zeolites for Propane Dehydrogenation. *Angew. Chem. Int. Ed.* 2020, 59, 19450-19459.
- [5] Zhang, X.; Yue, Y.; Gao, Z. Chromium Oxide Supported on Mesoporous SBA-15 as Propane Dehydrogenation and Oxidative Dehydrogenation Catalysts. *Catal. Lett.* 2002, 83, 19-25.
- [6] Michorczyk, P.; Pietrzyk, P.; Ogonowski, J. Preparation and Characterization of SBA-1 Supported Chromium Oxide Catalysts for CO<sub>2</sub> Assisted Dehydrogenation of Propane. *Microporous Mesoporous Mater.* 2012, 161, 56-66.
- [7] Xu, B.; Zheng, B.; Hua, W.; Yue, Y.; Gao, Z., Support Effect in Dehydrogenation of Propane in the Presence of CO<sub>2</sub> over Supported Gallium Oxide Catalysts. *J. Catal.* 2006, 239, 470-477.
- [8] Wang, G.; Zhang, H.; Zhu, Q.; Zhu, X.; Li, X.; Wang, H.; Li, C.; Shan, H., Sn-containing Hexagonal Mesoporous Silica (HMS) for Catalytic Dehydrogenation of Propane: An Efficient Strategy to Enhance Stability. *J. Catal.*

2017, 351, 90-94.

- [9] Xie, Z.; Yu, T.; Song, W.; Li, J.; Zhao, Z.; Liu, B.; Gao, Z.; Li, D. Highly Active Nanosized Anatase  $\text{TiO}_{2-x}$  Oxide Catalysts In Situ Formed through Reduction and Ostwald Ripening Processes for Propane Dehydrogenation. *ACS Catal.* 2020, 10, 14678-14693.
